# Supplementary material for: Noncanonical SQSTM1/p62-Nrf2 pathway activation mediates proteasome inhibitor resistance in multiple myeloma cells via redox, metabolic and translational reprogramming
Source: PubMed Central journal article supplement (PMC5340085; doi:10.18632/oncotarget.11960), 2016-09-10
Supplement: oncotarget-07-66360-s001.pdf [file oncotarget-07-66360-s001.pdf]

# Noncanonical SQSTM1/p62-Nrf2 pathway activation mediates proteasome inhibitor resistance in multiple myeloma cells via redox, metabolic and translational reprogramming

## Supplementary Material

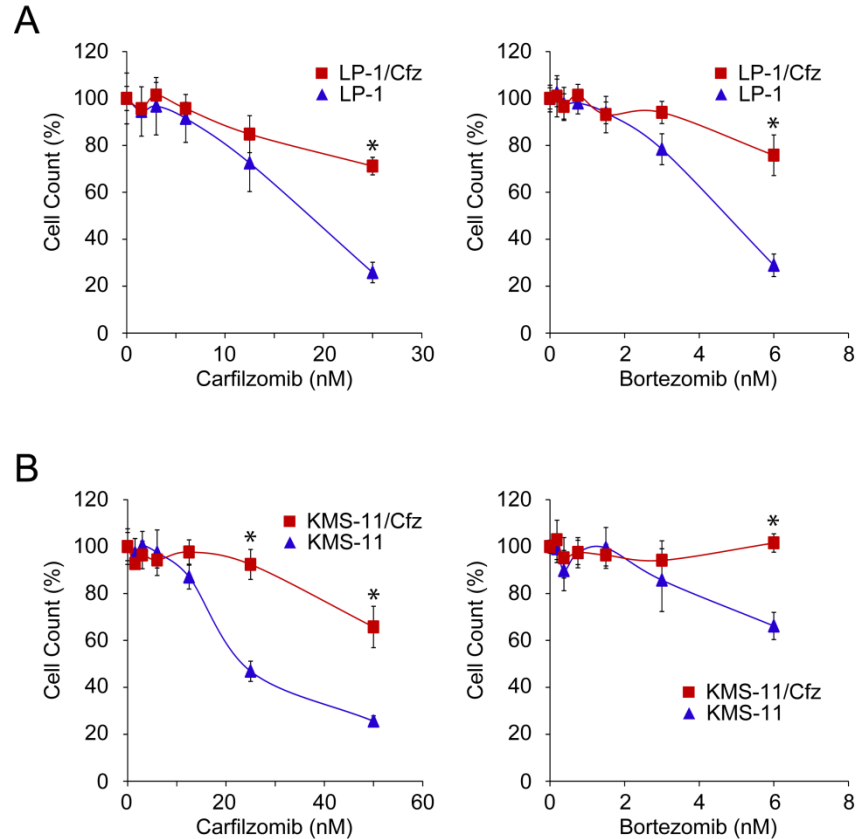

**Figure S1: Carfilzomib-resistant LP-1/Cfz and KMS-11/Cfz cells are cross-resistant to bortezomib.** **A.** LP-1/Cfz and parental LP-1 cells were treated with the indicated concentrations of carfilzomib (left graph) or bortezomib (right graph) for 48 hours and cell viability was determined by alamarBlue assay. \*,  $P < 0.001$  vs parental ( $n = 3$ ). **B.** KMS-11/Cfz and parental KMS-11 cells were treated with the indicated concentrations of carfilzomib (left graph) or bortezomib (right graph) for 48 hours and cell viability was determined by alamarBlue assay. \*,  $P < 0.001$  vs parental ( $n = 3$ ).

A

V\$NFE2\_01 (TRANSFAC M00037)

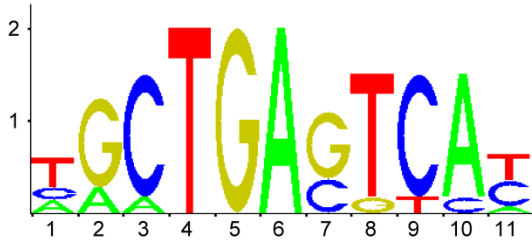

V\$NFE2\_01

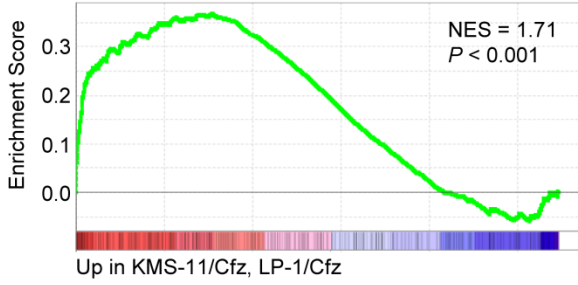

V\$NFE2\_01

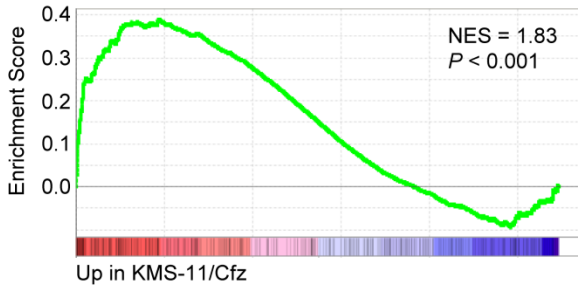

V\$NFE2\_01

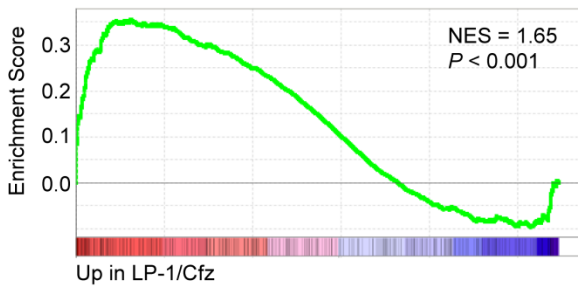

B

V\$NRF2\_Q4 (TRANSFAC M00821)

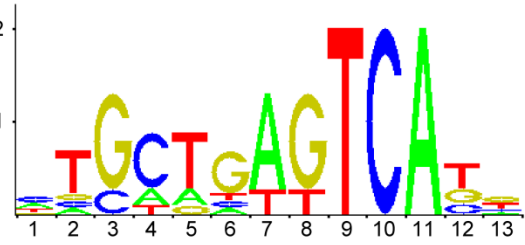

V\$NRF2\_Q4

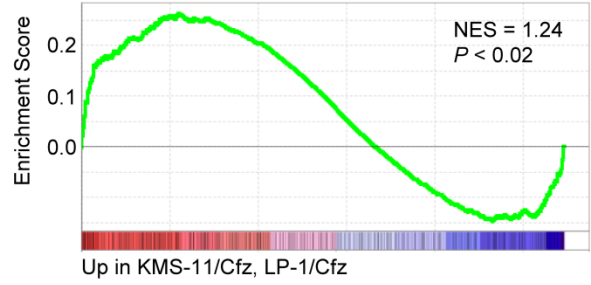

V\$NRF2\_Q4

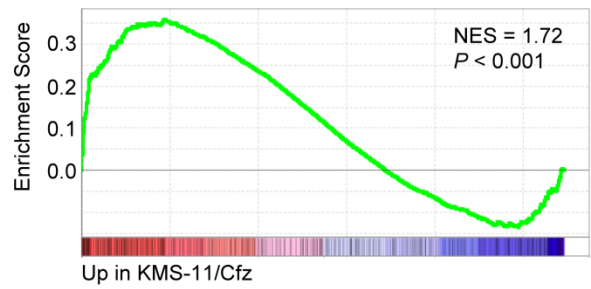

V\$NRF2\_Q4

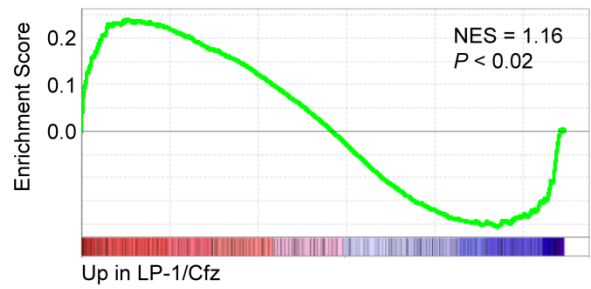

**Figure S2: Coenrichment of NF-E2 and Nrf2 binding site motifs in genes with increased expression in LP-1/Cfz and KMS-11/Cfz cells. A.** Sequence logo of the TRANSFAC position weight matrix for NF-E2 (V\$NFE2\_01; TRANSFAC M00037) and GSEA enrichment plots for pairwise comparisons of carfilzomib-resistant derivatives versus parental cells, combined and individually. Gene set: V\$NFE2\_01 (M8004). **B.** Sequence logo of the TRANSFAC position weight matrix for Nrf2 (V\$NRF2\_Q4; TRANSFAC M00821) and GSEA enrichment plots for pairwise comparisons of carfilzomib-resistant derivatives versus parental cells, combined and individually. Gene set: V\$NRF2\_Q4 (M14141).

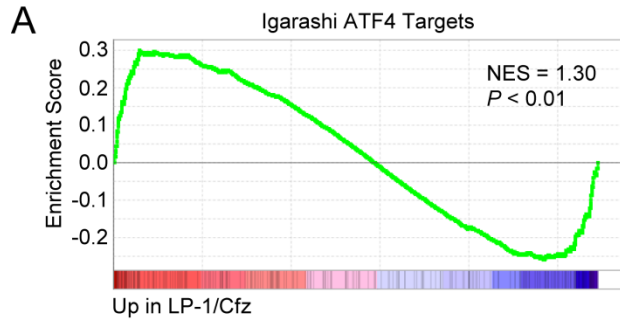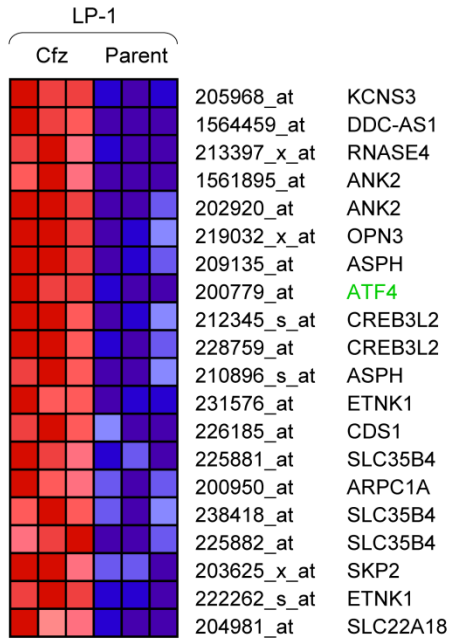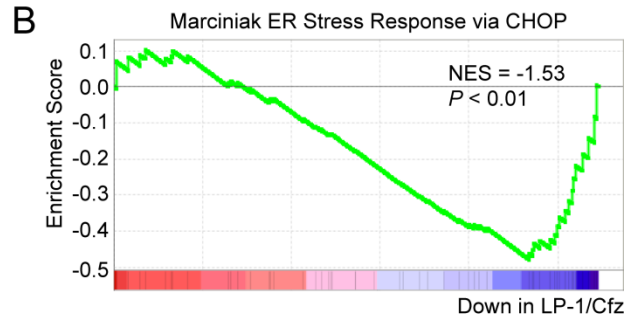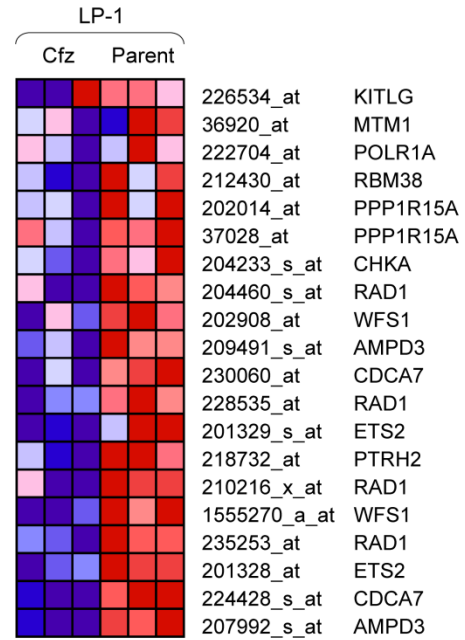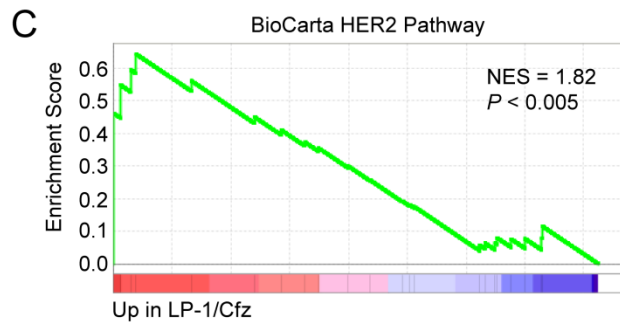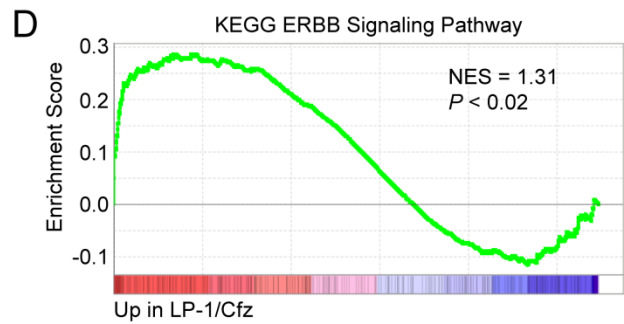

**Figure S3: ATF4 prosurvival and HER2/ERBB2 signatures are enriched in LP-1/Cfz cells.**

**A.** GSEA enrichment plot and heat map of the leading edge subset of ATF4 target genes upregulated in LP-1/Cfz (Cfz) versus parental LP-1 (Parent) cells (triplicate samples). A probe set for the *ATF4* gene is highlighted. Gene set: IGARASHI\_ATF4\_TARGETS\_DN, genes downregulated in A549 cells after knockdown of ATF4 by RNAi (M4779). **B.** GSEA enrichment plot and heat map of the leading edge subset of CHOP target genes downregulated in LP-1/Cfz cells. Gene set: MARCINIAK\_ER\_STRESS\_RESPONSE\_VIA\_CHOP, endoplasmic reticulum stress response genes dependent on CHOP (M1477). **C., D.** GSEA enrichment plots suggesting upregulation of the HER2/ERBB2 pathway in LP-1/Cfz cells. Gene sets: BIOCARTA\_HER2\_PATHWAY, role of ERBB2 in signal transduction and oncology (M18719) and KEGG\_ERBB\_SIGNALING\_PATHWAY (M12467).

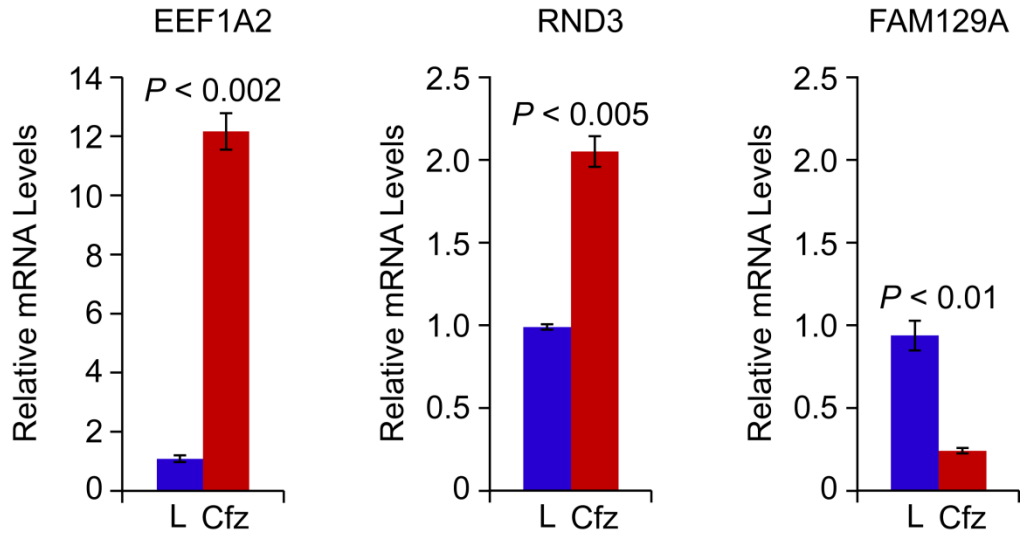

**Figure S4: Verification of LP-1/Cfz microarray expression data for selected Nrf2 targets.**

qRT-PCR analyses were performed to validate the differential expression of *EEF1A2*, *RND3* and *FAM129A* in LP-1/Cfz (Cfz) versus parental LP-1 (L) cells. Mean values of three qRT-PCR experiments. See Tables S1A (*EEF1A2*, *RND3*) and S2A (*FAM129A*) for expression changes determined from the microarray data.

A

**Human\_GABARAPL1\_NM\_031412\_Promoter\_chr12:10364936-10364980\_alignment\_block\_3**

|                        |                                                                            |
|------------------------|----------------------------------------------------------------------------|
| HUMAN_GABARAPL1_NM_... | tccttca <b>g-ctgact-cctctc</b> tt-caga <b>tctctgagtcac</b> gctctg          |
| CHIMP                  | tccttca <b>g-ctgact-cctctc</b> tt-caga <b>tctctgagtcac</b> gctctg          |
| GORILLA                | tccttca <b>g-ctgact-cctctc</b> tt-caga <b>tctctgagtcac</b> gctctg          |
| ORANGUTAN              | tccttca <b>g-ctgact-cctctc</b> tt-caga <b>tctctgagtcac</b> gctctg          |
| RHESUS                 | tccttca <b>g-ctgact-cctctc</b> tt-caga <b>tctctgagtcac</b> gctctg          |
| BABOON                 | tccttca <b>g-ctgact-cctctc</b> tt-caga <b>tctctgagtcac</b> gctctg          |
| MARMOSET               | tccttca <b>g-ctga</b> --- <b>catctctt</b> -caga <b>tctctgagtcac</b> gctctg |
| BUSHBABY               | cccttcac-cttaca-catatctc-aaaa <b>tctctgagtcac</b> gctcog                   |
| TREESHREW              | cccttcac-cttagg-catctctt-aaaa <b>tctctgagtcac</b> gctctg                   |
| GUINEA PIG             | cccttcac-----ctt-aaaa <b>gcctgagtcac</b> gctcog                            |
| SQUIRREL               | ccctttg-g-tttgca-cacccctt-aaaa <b>tctctgagtcac</b> gctctg                  |
| MOUSE                  | ttcttcac-cct-ta-cacttctt-aaaa <b>tccatgagtcac</b> gctctg                   |
| RAT                    | ttcttcac-cct-ta-cacttctt-aaaa <b>tccatgagtcac</b> gctgtg                   |
| RABBIT                 | -----cccgagtcacgcocctg                                                     |
| MOUSE LEMUR            | cccttca <b>g-ctgaca-cgtctc</b> tc-cgaa <b>tctctgagtcac</b> gctgtg          |
| TARSIER                | cccttcac-cttaca-catctctt-aaaa <b>tctctgagtcac</b> gctctg                   |
| DOG                    | cccttcag-cttcta-cat---ct-aaaa <b>tctctgagtcac</b> gctctg                   |
| HORSE                  | cccttcac-cttata-catctctt-aaaa <b>tctctgagtcac</b> gctctg                   |
| HEDGEHOG               | ccctgcac-tttaaa-catctctt-aaaa <b>tctctgagtcac</b> gctg--                   |
| COW                    | cccttcac-oggcta-catctctt-cagt <b>tctctgagtcac</b> gctctg                   |
| ALPACA                 | cccttcag-cttata-cgtctc-aaaa <b>tctctgagtcac</b> gctctg                     |
| MEGABAT                | cccttcac-ctaata-tgcctttt-ggaa <b>tctctgagtcac</b> gctttg                   |
| MICROBAT               | cccttcac-ctaata-cgtctctt-cgaa <b>tctctgagtcac</b> gatttg                   |
| CAT                    | cccttcac-cttata-catctcct-aaaa <b>tctctgagtcac</b> gctctg                   |
| ELEPHANT               | cccttcat-attaca-ggtctctt-aaaa <b>tctctgagtcac</b> gctcag                   |
| ROCK HYRAX             | cccttcac-cttaca-tatctctt-aaaa <b>tctctgagtcac</b> gctctg                   |
| TENREC                 | cccttcagcgttaca-cagctctt-aaaa <b>tctctgagtcac</b> gctctg                   |
| ARMADILLO              | cccttcat-cttaag-catctcct-caga <b>gcctgagtcac</b> tctctg                    |
| SLOTH                  | cccttcat-cgcaggacatctctt-caga <b>tctctgagtcac</b> gctgtg                   |
| OPOSSUM                | tctttccc-cgttct-ctccccttccaaa <b>tctctgagtcac</b> gctgtt                   |
| PLATYPUS               | ccctcagt-cttcca-cggagcag-aagg <b>tctctgagtcac</b> ccogtg                   |

position in block: -44 to -1

relative position to TSS (10365488) for reference species: -552 to -509

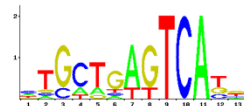

TRANSFAC: NRF2.Q4 (M00821)

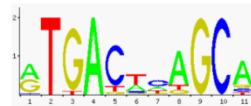

JASPAR: NFE2L2 (MA0150.1)

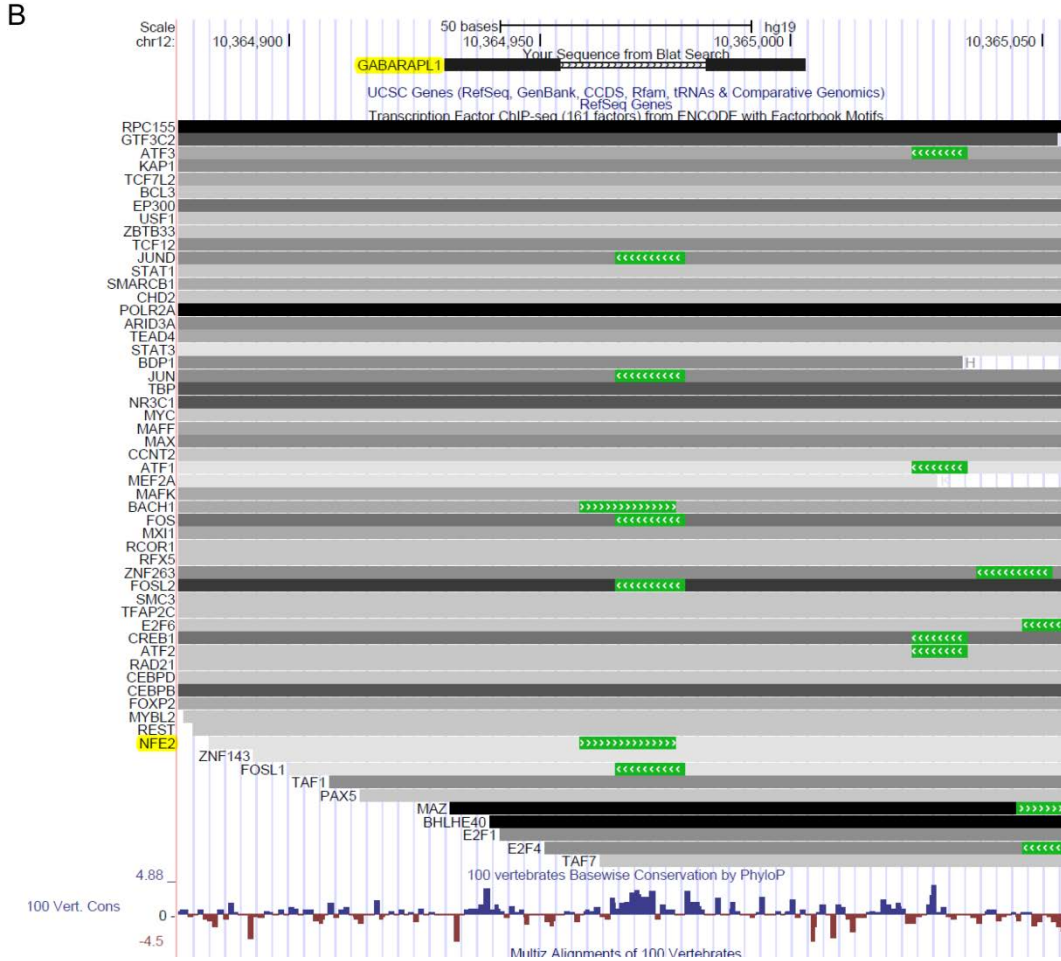

**Figure S5: Evolutionarily conserved predicted Nrf2 binding site in the GABARAPL1 promoter region. A.** Position of the Nrf2 consensus motifs (TRANSFAC NRF2.Q4 Motif ID, M00821 and JASPAR NFE2L2 Motif ID, MA0150.1) identified in the human GABARAPL1 promoter region (TSS chr12:10365488; NM\_031412) using the ConTra v2 transcription factor binding site motif discovery program across species (<http://bioit.dmbr.ugent.be/contrav2/index.php>). **B.** Position of Nrf2 ChIP-qPCR primers mapped to the same region of the GABARAPL1 promoter using BLAT in the UCSC genome browser (GRCh37/hg19 assembly). Note that the qPCR primers flank the Nrf2 motif which is an NF-E2 binding site identified by the ENCODE ChIP-seq Project (<https://www.encodeproject.org/>).



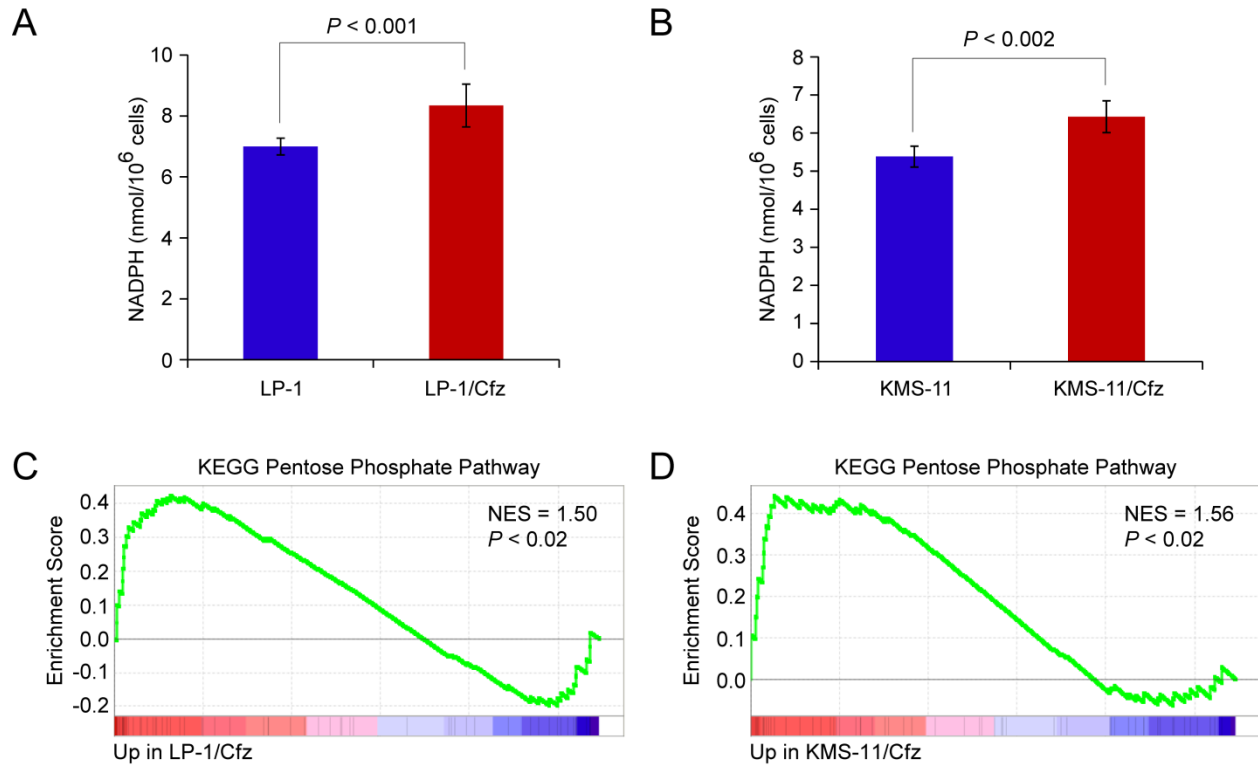

**Figure S6: NADPH levels are increased and pentose phosphate pathway genes are upregulated in LP-1/Cfz and KMS-11/Cfz cells.** **A.** NADPH levels in LP-1/Cfz and parental LP-1 cells. **B.** NADPH levels in KMS-11/Cfz and parental KMS-11 cells. **C.** GSEA enrichment plot for triplicate samples of LP-1/Cfz versus parental LP-1 cells. Gene set: KEGG pentose phosphate pathway (M1386; KEGG Pathway hsa00030). **D.** GSEA enrichment plot for triplicate samples of KMS-11/Cfz versus parental KMS-11 cells. Gene set: KEGG pentose phosphate pathway (M1386; KEGG Pathway hsa00030).

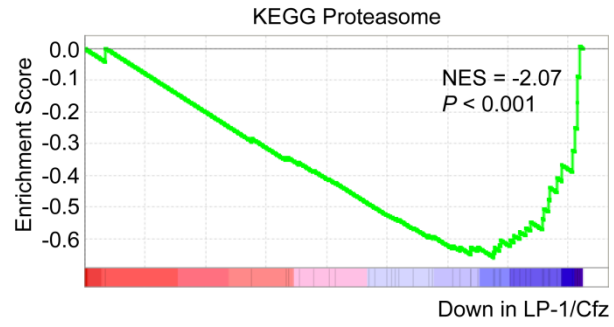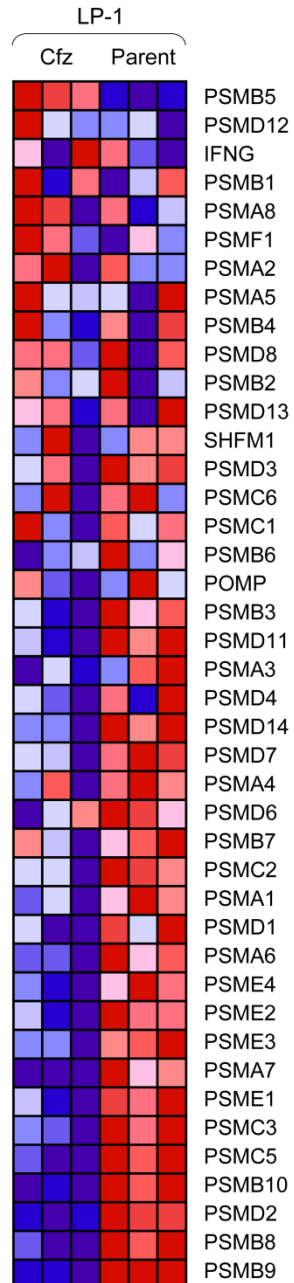

**Figure S7: GSEA enrichment plot and heat map showing downregulation of 19S proteasome subunit genes in LP-1/Cfz cells.** GSEA enrichment plot and heat map of gene expression changes for triplicate samples of LP-1/Cfz (Cfz) and LP-1 (Parent) cells. Gene set: KEGG proteasome (KEGG Pathway hsa03050; M10680). Whereas mRNA levels of *PSMB5* encoding the  $\beta 5$  catalytic subunit of the 20S proteasome targeted by carfilzomib were modestly increased in LP-1/Cfz cells, mRNA levels of *PSMB8* encoding the immunoproteasome  $\beta 5i/LMP7$  subunit that is also specifically targeted by carfilzomib and those of many of the 19S (*PSMC2*, *PSMC3*, *PSMC5*, *PSMD1*, *PSMD14*, *PSMD2*, *PSMD6* and *PSMD7*) and 11S (*PSME1*, *PSME2*, *PSME3* and *PSME4*) proteasome subunit genes were decreased.

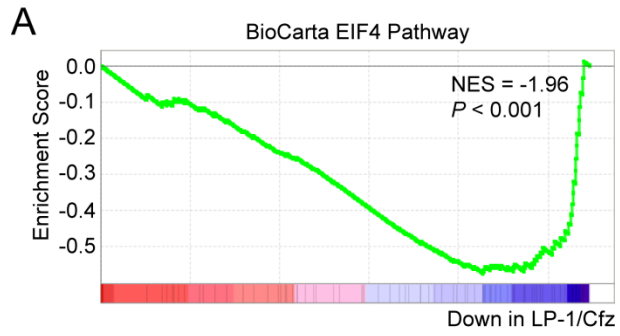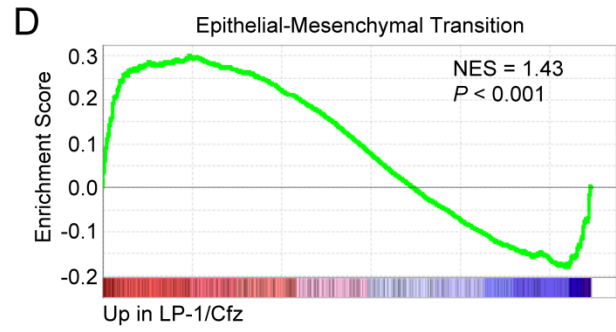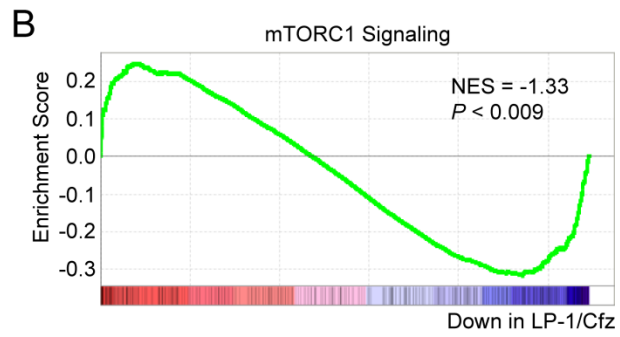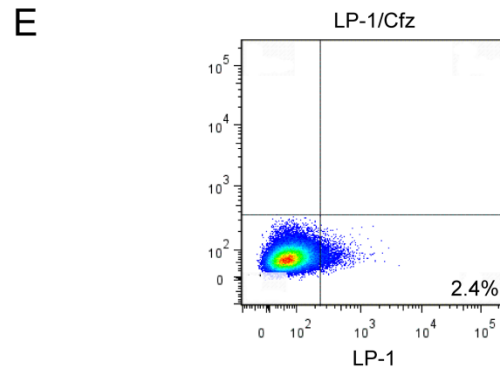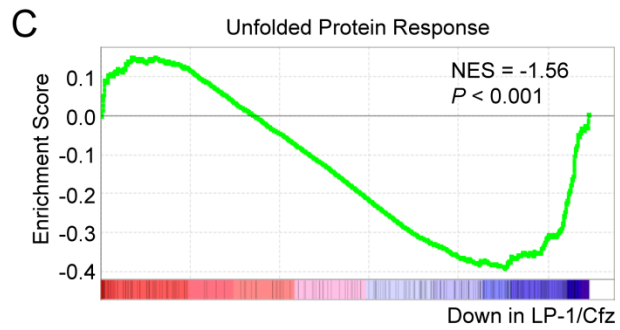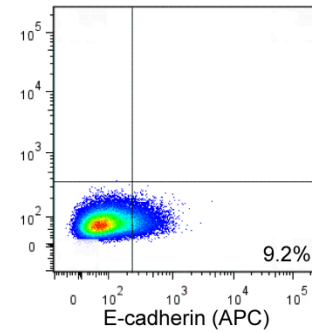

**Figure S8: GSEA suggests altered translational regulation in LP-1/Cfz cells and acquisition of EMT-like features.** **A.** GSEA enrichment plot showing downregulation of EIF4 pathway genes in LP-1/Cfz cells. Gene set: BIOCARTA EIF4\_PATHWAY, regulation of eIF4E and p70 S6 kinase (M4791). **B.** GSEA enrichment plot showing downregulation of mTORC1 signaling in LP-1/Cfz cells. Gene set: HALLMARK\_MTORC1\_SIGNALING. **C.** GSEA indicated that genes upregulated during the UPR are downregulated in LP-1/Cfz cells. Gene set: HALLMARK\_UNFOLDED\_PROTEIN\_RESPONSE (M5922). **D.** GSEA indicated enrichment of an EMT-like expression signature in LP-1/Cfz cells. Gene set: HALLMARK\_EPITHELIAL\_MESENCHYMAL\_TRANSITION (M5930). **E.** Decreased cell surface expression of E-cadherin on LP-1/Cfz cells compared to parental LP-1 cells determined by flow cytometry after staining with an allophycocyanin (APC)-conjugated anti-E-cadherin antibody. Percentages of E-cadherin-positive cells are indicated.

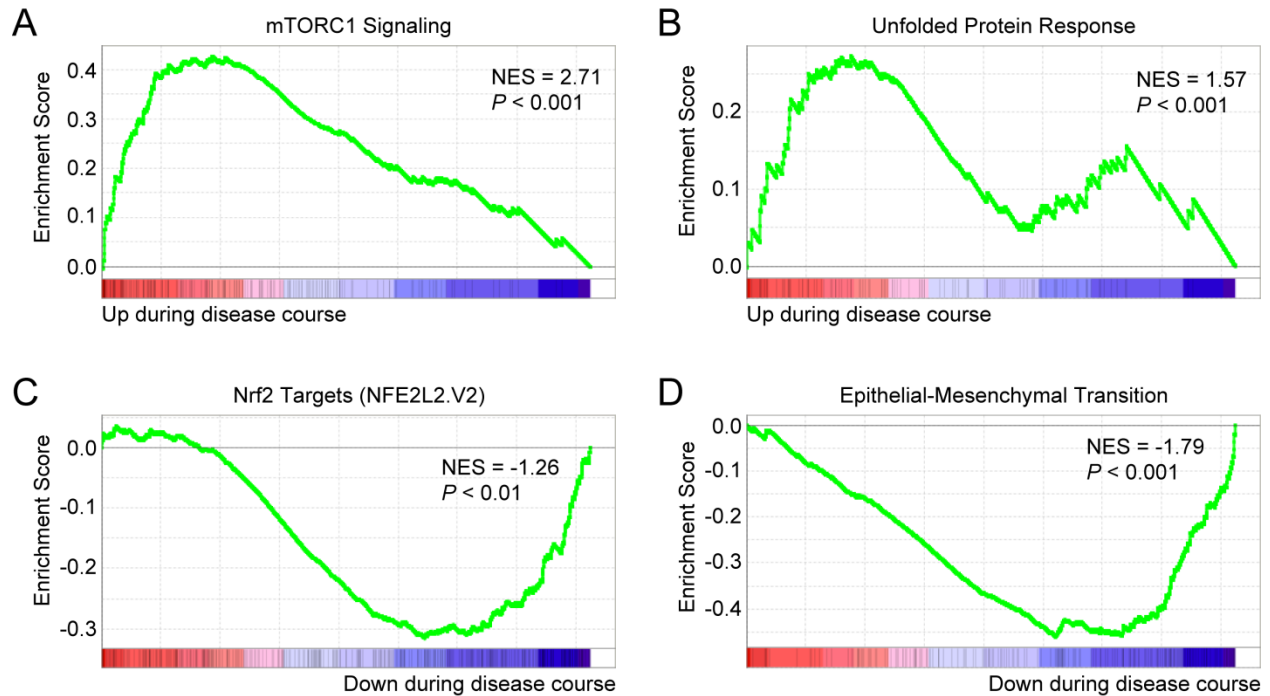

**Figure S9: Gene expression signatures of MM cells without increased *EIF4E3* and/or *GABARAPL1* expression during progression of disease.** Microarray data was obtained from the GEO database (GEO accession number GSE36824) for patient-paired relapse and diagnostic samples from 17 patients treated with various regimens. GSEA was performed on the samples from 10 patients where *EIF4E3* and/or *GABARAPL1* expression was not increased during disease course. **A.** Genes upregulated through activation of the mTORC1 complex were upregulated in these cases. Gene set: HALLMARK\_MTORC1\_SIGNALING (M5924). **B.** GSEA indicated enrichment for genes upregulated during the UPR. Gene set: HALLMARK\_UNFOLDED\_PROTEIN\_RESPONSE (M5922). **C.** GSEA indicated that Nrf2 target genes were downregulated during disease course in these cases. Gene set: NFE2L2.V2 (M2870). **D.** These patients had decreased enrichment of an EMT-like expression signature. Gene set: HALLMARK\_EPITHELIAL\_MESENCHYMAL\_TRANSITION (M5930).
